# Supplementary material
Source: Springer Nature journal article supplement (https://www.springermedizin.de/resource/supplementary/12874_2011_622_MOESM1_ESM.pdf/9432252)

**a**  
Exposed

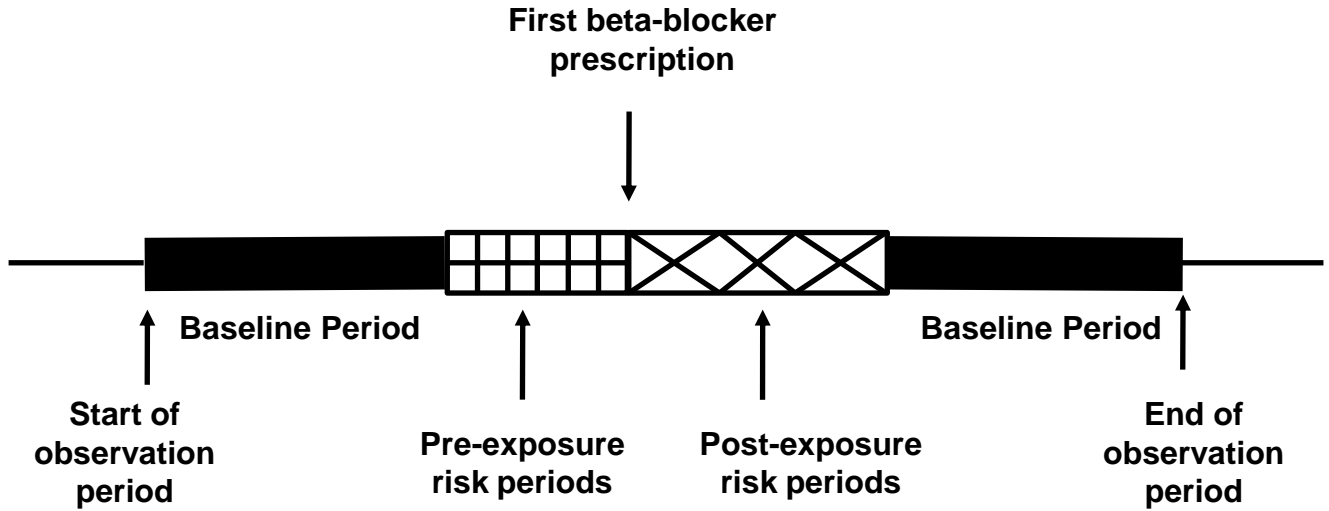

**b**  
Unexposed

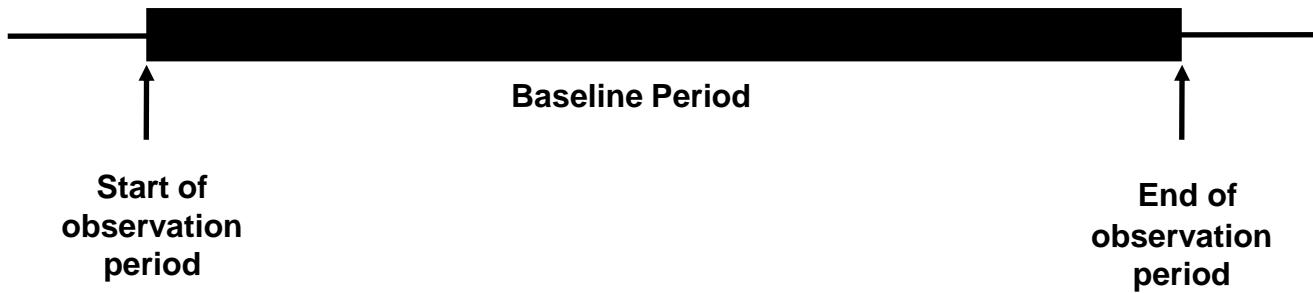

Supplement: MOESM1 [file 9432252]
